# Supplementary material for: Histone Deacetylases Play a Major Role in the Transcriptional Regulation of the Plasmodium falciparum Life Cycle
Source: PLoS Pathog. 2010 Jan 22;6(1):e1000737. doi: 10.1371/journal.ppat.1000737 (PMC2809759; doi:10.1371/journal.ppat.1000737)
Supplement: Table S1 — The effect of apicidin treatment for 1 hour on four histone modifications (H4K8Ac, H3K9Ac, H4Ac4 and H3K4me3) in the schizont stage was studied. In addition, the effect of apicidin treatment for 1 hour on H4K8Ac in the trophozoite stage was also studied. Chromatin immunoprecipitations in conjunction with microarray analysis (ChIP-chip) were carried out.The method Significance Analysis of Microarrays (SAM) was used to statistically discriminate MOEs showing altered histone modifications induced by apicidin treatment. SAM assigned a score to each MOE on the basis of change in acetylation or methylation level relative to the standard deviation of repeated measurements for that MOE. Different SAM threshold cutoffs were used to generate sets of MOEs showing significant changes for each histone modification. For each set the percentage of MOEs identified by chance, the false discovery rate (FDR), was determined. The significance of the overlap between the different sets of MOEs corresponding to each of the histone modifications was also determined. Overlap numbers and P values shown in red correspond to positive correlation. (0.02 MB XLS) [file ppat.1000737.s004.xls]

## Sheet: Sheet1
MOE OVERLAP
		H4T4	H4T4	H4T4
SAM threshold cutoff	H3K9 1.9 (0.00 FDR(%) median)	3.25 (0.111 FDR(%) median)	3.5 (0.084 FDR (%) median)	3.6 (0.081 FDR (%) median)
NO. OF MOE	1603	1694	1228	1050
OVERLAP		563	448	397		The effect of apicidin treatment for 1 hour on four histone modifications (H4K8Ac, H3K9Ac, H4Ac4 and H3K4me3) in the schizont stage was studied. In addition, the effect of apicidin treatment for 1 hour on H4K8Ac in the trophozoite stage was also studied. Chromatin immunoprecipitations in conjunction with microarray analysis (ChIP-chip) were carried out.
P value		0.00240544	5.57479e-07	0		The method Significance Analysis of Microarrays (SAM) was used to statistically discriminate MOEs showing altered histone modifications induced by apicidin treatment. SAM assigned a score to each MOE on the basis of change in acetylation or methylation level relative to the standard deviation of repeated measurements for that MOE. Different SAM threshold cutoffs were used to generate sets of MOEs…
SAM threshold cutoff	H3K9 2 (0.00 FDR(%) median)					Overlap numbers and P values shown in red correspond to positive correlation.
NO. OF MOE	1216
OVERLAP		465	372	252
P value		7.18262e-07	0	>0.05
SAM threshold cutoff	H3K9 2.1 (0.00 FDR(%) median)
NO. OF MOE	871
OVERLAP		343	282	253
P value		9.2576e-07	0	0
MOE OVERLAP
		H4K8 schizont	H4K8 schizont	H4K8 schizont
SAM threshold cutoff	H3K9 1.9 (0.00 FDR(%) median)	4.75 (0.00 FDR(%) median)	5 (0.00 FDR(%) median)	5.5 (0.00 FDR(%) median)
NO. OF MOE	1603	1993	1627	1071
OVERLAP		154	116	65
P value		0	0	0
SAM threshold cutoff	H3K9 2 (0.00 FDR(%) median)
NO. OF MOE	1216
OVERLAP		117	88	49
P value		0	0	0
SAM threshold cutoff	H3K9 2.1 (0.00 FDR(%) median)
NO. OF MOE	871
OVERLAP		80	61	31
P value		0	0	0
MOE OVERLAP
		H3K4ME3	H3K4ME3	H3K4ME3
SAM threshold cutoff	H3K9 1.9 (0.00 FDR(%) median)	3.75 (0.00 FDR(%) median)	4 (0.00 FDR(%) median)	4.15 (0.00 FDR(%) median)
NO. OF MOE	1603	1871	1197	927
OVERLAP		341	225	177
P value		0	0	0
SAM threshold cutoff	H3K9 2 (0.00 FDR(%) median)
NO. OF MOE	1216
OVERLAP		265	179	136
P value		0	0	0
SAM threshold cutoff	H3K9 2.1 (0.00 FDR(%) median)
NO. OF MOE	871
OVERLAP		205	136	105
P value		0	3.69615e-06	8.11831e-05
MOE OVERLAP
		H3K4ME3	H3K4ME3	H3K4ME3
SAM threshold cutoff	H4K8 schizont 4.75 (0.00 FDR(%) median)	3.75 (0.00 FDR(%) median)	4 (0.00 FDR(%) median)	4.15 (0.00 FDR(%) median)
NO. OF MOE	1993	1871	1197	927
OVERLAP		742	507	412
P value		0.0261026	0.000231952	4.65172e-06
SAM threshold cutoff	H4K8 schizont 5 (0.00 FDR(%) median)
NO. OF MOE	1627
OVERLAP		621	429	355
P value		0.00541537	3.8795e-05	0
SAM threshold cutoff	H4K8 schizont 5.5 (0.00 FDR(%) median)
NO. OF MOE	1071
OVERLAP		432	310	265
P value		0.000181278	0	0
MOE OVERLAP
		H4T4	H4T4	H4T4
SAM threshold cutoff	H4K8 schizont 4.75 (0.00 FDR(%) median)	3.25 (0.111 FDR(%) median)	3.5 (0.084 FDR (%) median)	3.6 (0.081 FDR (%) median)
NO. OF MOE	1993	1694	1228	1050
OVERLAP		173	112	91
P value		0	0	0
SAM threshold cutoff	H4K8 schizont 5 (0.00 FDR(%) median)
NO. OF MOE	1627
OVERLAP		134	84	67
P value		0	0	0
SAM threshold cutoff	H4K8 schizont 5.5 (0.00 FDR(%) median)
NO. OF MOE	1071
OVERLAP		79	45	38
P value		0	0	0
MOE OVERLAP
		H3K4ME3	H3K4ME3	H3K4ME3
SAM threshold cutoff	H4T4 3.25 (0.111 FDR(%) median)	3.75 (0.00 FDR(%) median)	4 (0.00 FDR(%) median)	4.15 (0.00 FDR(%) median)
NO. OF MOE	1694	1871	1197	927
OVERLAP		285	161	110
P value		0	0	0
SAM threshold cutoff	H4T4 3.5 (0.084 FDR (%) median)
NO. OF MOE	1228
OVERLAP		202	114	77
P value		0	0	0
SAM threshold cutoff	H4T43.6 (0.081 FDR (%) median)
NO. OF MOE	1050
OVERLAP		169	96	64
P value		0	0	0
MOE OVERLAP
		H4K8 trophozoite	H4K8 trophozoite	H4K8 trophozoite
SAM threshold cutoff	H4K8 schizont 4.75 (0.00 FDR(%) median)	1.6 (0.021 FDR(%) median)	1.7 (0.018 FDR(%) median)	1.8 (0.019 FDR(%) median)
NO. OF MOE	1993	1708	1063	628
OVERLAP		531	357	230
P value		0	0.0172648	>0.05
SAM threshold cutoff	H4K8 schizont 5 (0.00 FDR(%) median)
NO. OF MOE	1627
OVERLAP		426	287	188
P value		1.16287e-06	0.0214078	>0.05
SAM threshold cutoff	H4K8 schizont 5.5 (0.00 FDR(%) median)
NO. OF MOE	1071
OVERLAP		281	196	126
P value		9.55278e-05	>0.05	>0.05
